# Supplementary material for: Phenolic Compound Profile by UPLC-MS/MS and Encapsulation with Chitosan of Spondias mombin L. Fruit Peel Extract from Cerrado Hotspot—Brazil
Source: MDPI journal article supplement (doi:10.3390/molecules27082382), 2022-04-07
Supplement: s1 [file s1]

**Table S1.** List of the compounds included in the study, including CAS number, chemical formula, molecular weight and supplier.

| Compound                        | CAS n°     | METLIN ID | KEGG ID | Chemical formula | MW (Da) | Supplier    |
|---------------------------------|------------|-----------|---------|------------------|---------|-------------|
| <i>Benzoic acid derivatives</i> |            |           |         |                  |         |             |
| 2,5-Dihydroxybenzoic acid       | 490-79-9   | 618       | C00628  | C7H6O4           | 154.12  | Aldrich     |
| Gallic acid                     | 149-91-7   | 3295      | C01424  | C7H6O5           | 170.12  | Aldrich     |
| Vanillin                        | 121-33-5   | 62927     | C00755  | C8H8O3           | 152.14  | Carlo Erba  |
| Vanillic acid                   | 121-34-6   | 5471      | na      | C8H8O4           | 168.14  | Carl Roth   |
| Methyl gallate                  | 99-24-1    | 44726     | na      | C8H8O5           | 184.14  | Fluka       |
| Cinnamic acid                   | 621-82-9   | 310       | C10438  | C9H8O2           | 148.15  | Aldrich     |
| Syringaldehyde                  | 134-96-3   | na        | na      | C9H10O4          | 182.17  | Aldrich     |
| Ellagic acid                    | 476-66-4   | 3430      | C10788  | C14H6O8          | 302.19  | Fluka       |
| <i>Coumarins</i>                |            |           |         |                  |         |             |
| Daphnetin                       | 486-35-1   | na        | na      | C9H6O4           | 178.14  | Biomedicals |
| Esculin                         | 531-75-9   | na        | na      | C15H16O9         | 340.29  | Carl Roth   |
| Scopoletin                      | 92-61-5    | na        | na      | C10H8O4          | 192.16  | Fluka       |
| Fraxin                          | 524-30-1   | na        | na      | C16H18O10        | 370.31  | Carl Roth   |
| <i>Phenylpropanoids</i>         |            |           |         |                  |         |             |
| <i>p</i> -Coumaric acid         | 501-98-4   | 307       | C00811  | C9H8O3           | 164.16  | Sigma       |
| Caffeic acid                    | 331-39-5   | 3316      | C01481  | C9H8O4           | 180.16  | Sigma       |
| Ferulic acid                    | 1135-24-6  | 4156      | C01494  | C10H10O4         | 194.18  | Carl Roth   |
| Neochlorogenic acid             | 906-33-2   | na        | na      | C16H18O9         | 354.31  | TransMIT    |
| Cryptochlorogenic acid          | 905-99-7   | na        | na      | C16H18O9         | 354.31  | TransMIT    |
| Chlorogenic acid                | 327-97-9   | 3498      | C00852  | C16H18O9         | 354.31  | TransMIT    |
| Sinapyl alcohol                 | 537-33-7   | 44805     | C02325  | C11H14O4         | 210.23  | Aldrich     |
| <i>trans</i> -Coutaric acid     | 27174-07-8 | na        | na      | C13H12O8         | 296.23  | Isolated    |
| <i>Stilbenes</i>                |            |           |         |                  |         |             |
| <i>trans</i> -Resveratrol       | 501-36-0   | 6979      | C03582  | C14H12O3         | 228.24  | Isolated    |
| <i>trans</i> -Piceid            | 27208-80-6 | 53240     | C10275  | C20H22O8         | 390.38  | Isolated    |
| <i>cis</i> -Piceid              | na         | na        | na      | C20H22O8         | 390.38  | Isolated    |

|                            |            |       |        |           |        |               |
|----------------------------|------------|-------|--------|-----------|--------|---------------|
| <i>Dihydrochalcones</i>    |            |       |        |           |        |               |
| Phloretin                  | 60-82-2    | 3405  | C00774 | C15H14O5  | 274.26 | TransMIT      |
| Phloridzin                 | 60-81-1    | 3535  | C01604 | C21H24O10 | 436.41 | TransMIT      |
| Trilobatin                 | 4192-90-9  | na    | na     | C21H24O10 | 532.45 | Extrasynthese |
| <i>Flavones</i>            |            |       |        |           |        |               |
| Apigenin                   | 520-36-5   | 3397  | C01477 | C15H10O5  | 270.24 | Carl Roth     |
| Sinensetin                 | 2306-27-6  | 49674 | na     | C20H20O7  | 372.36 | Extrasynthese |
| Luteolin                   | 491-70-3   | 3409  | C01514 | C15H10O6  | 286.24 | Sigma         |
| Luteolin-7-O-Glucoside     | 68321-11-9 | na    | C03951 | C21H20O11 | 448.37 | Sigma         |
| Hesperidin                 | 520-26-3   | 3678  | C09755 | C28H34O15 | 610.56 | Sigma         |
| <i>Flavanones</i>          |            |       |        |           |        |               |
| Naringenin                 | 480-41-1   | 3401  | C00509 | C15H12O5  | 272.25 | Carl Roth     |
| <i>Flavonols</i>           |            |       |        |           |        |               |
| Quercetin                  | 117-39-5   | 409   | C00389 | C15H10O7  | 302.24 | Fluka         |
| Quercetin-3-O-rhamnoside   | 522-12-3   | 43747 | C01750 | C21H20O11 | 448.38 | Fluka         |
| Quercetin-3-O-glucuronide  | 22688-79-5 | na    | na     | C21H18O13 | 478.37 | Extrasynthese |
| Rutin                      | 153-18-4   | 3677  | C05625 | C27H30O16 | 610.52 | Extrasynthese |
| Kaempferol                 | 520-18-3   | 3410  | C05903 | C15H10O6  | 286.23 | Carl Roth     |
| Kaempferol-3-O-glucoside   | 480-10-4   | 64226 | C12249 | C21H20O11 | 448.37 | Extrasynthese |
| Kaempferol-3-O-rutinoside  | 17650-84-9 | 50150 | na     | C27H30O15 | 594.53 | Extrasynthese |
| Myricetin                  | 529-44-2   | 3448  | C10107 | C15H10O8  | 318.23 | Extrasynthese |
| Syringetin                 | 4423-37-4  | 50914 | C11620 | C17H14O8  | 346.29 | Extrasynthese |
| Syringetin-3-O-glucoside   | 40039-49-4 | 50904 | na     | C23H24O13 | 508.43 | Extrasynthese |
| Rhamnetin                  | 90-19-7    | 43977 | C10176 | C16H12O7  | 316.26 | Extrasynthese |
| Isorhamnetin               | 480-19-3   | 3445  | C10084 | C16H12O7  | 316.26 | Extrasynthese |
| Isorhamnetin-3-O-glucoside | 5041-82-7  | 49007 | na     | C22H22O12 | 478.41 | Extrasynthese |

na= not available.
